# Supplementary material for: Early dysfunction and progressive degeneration of the subthalamic nucleus in mouse models of Huntington's disease
Source: eLife. 2016 Dec 20;5:e21616. doi: 10.7554/eLife.21616 (PMC5199195; doi:10.7554/eLife.21616)
Supplement: Figure 1—source data 1. — DOI: http://dx.doi.org/10.7554/eLife.21616.003 [file elife-21616-fig1-data1.xlsx]

## Sheet: Figure 1B-C
WT			BACHD
Frequency	CV		Frequency	CV
16.6578	0.118887		0	NA
16.2821	0.095923		6.86436	0.366193
19.1399	0.183877		6.39509	0.415879
18.7681	0.0901074		0	NA
13.953	0.176031		0.231594	1.06858
28.0836	0.270411		5.53526	0.473292
11.808	0.320777		4.66527	0.403508
16.7751	0.195212		5.8924	0.332933
5.60255	0.321844		0.167291	1.95011
5.07331	0.360748		0.166492	0.945757
0.891822	1.18577		4.5294	0.826796
7.74174	0.346512		8.59476	0.795582
3.111	0.632311		8.61104	0.756385
7.7688	0.476375		21.207	0.583089
3.53895	0.79598		11.9165	0.241322
3.85238	1.03822		2.98392	0.785068
7.4085	0.279597		0	NA
7.59763	0.286864		4.76404	0.42568
2.7398	0.47141		0.506919	1.18274
4.74361	0.227575		0.820277	1.0233
12.515	0.178802		0	NA
2.58018	0.584256		2.81239	0.462666
4.23012	0.373841		0.245924	1.67639
3.93716	0.338958		0	NA
6.79209	0.267935		1.46231	1.28342
1.63372	0.656984		6.57722	0.388115
3.30797	0.641449		12.1103	0.238344
3.66946	0.558711		0.789827	1.61456
7.17721	0.137881		3.64897	0.498522
5.506	0.282078		15.489	0.17913
7.03136	0.199332		0	NA
8.3612	0.227115		13.0774	0.217647
6.61376	0.224815		6.6357	0.365567
5.18672	0.229761		0	NA
4.94022	0.293889		0.20386	1.14724
3.90153	0.179646		0	NA
5.52059	0.476907		0.715154	1.51977
4.4825	0.808194		0	NA
6.73301	0.376744		0.430719	0.961623
0.182472	0.980786		5.95132	0.247708
2.75292	1.6558		9.67867	0.278107
12.3404	0.357471		10.2227	0.35489
10.686	0.679119		8.00641	0.424404
20.6271	0.311592		9.87654	0.302153
22.245	0.254327		7.3959	0.195762
6.31114	0.416497		0.986875	1.20122
6.01359	0.324553		0.0874355	0.926117
17.0855	0.880794		1.5196	0.823879
4.65181	0.569661		0	NA
21.2355	0.278164		0	NA
8.29669	0.486775		0.210628	1.13828
10.0241	0.514755		2.34185	1.39569
12.3583	0.542086		14.1109	0.314716
6.17627	0.543592		1.3264	1.63492
0.389545	1.10315		10.3841	0.376123
7.60977	0.283243		8.45737	0.276793
17.6894	0.167147		0	NA
4.6856	0.655281		10.1969	0.166159
6.26645	0.39916		2.04428	1.10031
0.222836	1.42014		8.63334	0.170319
5.72574	0.485113		10.7953	0.22831
6.06759	0.331897		3.561	0.571256
18.655	0.0956105		10.2549	0.196772
6.15157	0.319599		11.0481	0.226321
3.0248	1.13675		15.673	0.167889
20.5715	0.139382		12.8844	0.34328
6.85377	0.574117		10.5756	0.181954
11.0031	0.102396		11.1856	0.207369
16.684	0.222581		9.32053	0.23375
10.7492	0.126755		7.78816	0.360561
13.2315	0.0881445		9.13993	0.722164
17.8403	0.105932		1.43658	1.11564
22.3924	0.0790631		6.5066	0.243757
14.8093	0.125174		7.92707	0.284059
11.3129	0.127948		2.58198	0.836354
17.1145	0.153365		3.19724	0.541612
0	NA		0.0332568	0.610928
0	NA		13.616	0.188333
1.50588	0.779797		9.1295	0.164336
0	NA		1.36281	1.4577
6.55795	0.174304		3.30675	0.438769
8.18603	0.159379		10.3666	0.389146
5.28305	0.74043		0	NA
5.90552	0.268311		2.37115	1.45011
8.59567	0.173177		11.5912	0.260581
5.05064	0.394793		9.01039	0.20926
6.86124	0.573725		7.95482	0.245597
16.4755	0.277462		4.18305	0.730779
12.5669	0.512045		10.5251	0.195956
12.573	0.198346		7.54546	0.800423
10.8482	0.0798299		1.61012	1.0593
10.8126	0.0904756		3.10684	0.939883
8.0579	0.0775697		6.85354	0.220225
5.48386	0.327557		3.25108	0.798888
9.73431	0.0925799		6.63658	0.581205
12.2026	0.0780894		0	NA
8.88767	0.099284		15.7931	0.154956
5.71979	0.199105		10.5506	0.197533
20.1686	0.0868637		6.52982	0.526123
14.5744	0.118815		5.7088	0.138698
9.9119	0.212997		4.46936	0.258013
9.12477	0.137624		9.16053	0.275059
9.65933	0.122856		9.63777	0.100761
7.59104	0.115967		0	NA
12.26	0.0957473		12.5224	0.111581
8.98127	0.160123		0	NA
3.58847	0.300237		2.43897	0.273697
10.0405	0.214414		9.33275	0.127079
3.33542	0.410472		6.01605	0.106793
7.18245	0.390518		3.03814	0.519466
5.93964	0.228754		2.64416	0.627998
5.47564	0.218133		18.1498	0.114697
6.55812	0.137711		19.075	0.143051
11.3356	0.376666		16.1525	0.123375
19.7583	0.15821		9.6811	0.125289
17.5685	0.4459		18.3172	0.0938705
11.679	0.3774		5.354	0.233881
18.8682	0.159119		11.8519	0.121704
15.0446	0.297969		15.9526	0.0785
0	NA		14.5126	0.42638
18.0716	0.108172		19.7513	0.10587
15.7981	0.296375		9.43455	0.144954
10.4761	0.145339		7.48864	0.838644
10.1679	0.180523		11.8446	0.210063
19.6745	0.144722		6.157	0.151324
9.56442	0.108727		9.84976	0.131566
9.4842	0.139326
18.9253	0.109433
