# Supplementary material for: Early dysfunction and progressive degeneration of the subthalamic nucleus in mouse models of Huntington's disease
Source: eLife. 2016 Dec 20;5:e21616. doi: 10.7554/eLife.21616 (PMC5199195; doi:10.7554/eLife.21616)
Supplement: Figure 1—source data 2. — DOI: http://dx.doi.org/10.7554/eLife.21616.004 [file elife-21616-fig1-data2.xlsx]

## Sheet: Figure 1-source data 2.txt
WT			BACHD
Control	TFB-TBOA		Control	TFB-TBOA
0.0410771	0.068597		0.0408867	0.0505521
0.0372346	0.0398499		0.0343685	0.0357798
0.046097	0.0859508		0.0558804	0.0485871
0.0389498	0.0407569		0.0700318	0.0598298
0.0404845	0.0454377		0.0389679	0.0403052
0.048847	0.0656337		0.0482981	0.0272734
0.0288579	0.0426662		0.0387281	0.0412679
0.0335565	0.0682784		0.0475504	0.0566405
0.0369956	0.0501802		0.0786571	0.0506805
			0.0557747	0.0314838
