# Supplementary material for: Early dysfunction and progressive degeneration of the subthalamic nucleus in mouse models of Huntington's disease
Source: eLife. 2016 Dec 20;5:e21616. doi: 10.7554/eLife.21616 (PMC5199195; doi:10.7554/eLife.21616)
Supplement: Figure 2—source data 1. — DOI: http://dx.doi.org/10.7554/eLife.21616.006 [file elife-21616-fig2-data1.xlsx]

## Sheet: Figure 2A-B
WT			BACHD
Amplitude	Decay		Amplitude	Decay
22.6288	0.0410771		45.584	0.0408867
29.8075	0.023494		15.952	0.0367884
67.5478	0.0372346		30.897	0.0343685
53.2939	0.046097		59.4831	0.0558804
37.634	0.0272734		42.9261	0.0700318
33.7869	0.0389498		78.3348	0.0389679
42.6616	0.0404845		52.3219	0.0482981
79.4643	0.048847		93.6325	0.0387281
59.7668	0.0288579		107.645	0.0475504
61.0703	0.046299		13.7461	0.0786571
60.9378	0.0335565		22.0816	0.0557747
46.8501	0.0369956
