# Supplementary material for: Early dysfunction and progressive degeneration of the subthalamic nucleus in mouse models of Huntington's disease
Source: eLife. 2016 Dec 20;5:e21616. doi: 10.7554/eLife.21616 (PMC5199195; doi:10.7554/eLife.21616)
Supplement: Figure 2—source data 2. — DOI: http://dx.doi.org/10.7554/eLife.21616.007 [file elife-21616-fig2-data2.xlsx]

## Sheet: Figure 2E
WT			BACHD
Control	TFB-TBOA		Control	TFB-TBOA
0.145062	0.150617		0.0444695	0.0978731
0.0623442	0.103655		0.120347	0.151176
0.0633093	0.116193		0.0406922	0.0503035
0.0946185	0.134695		0.0850774	0.118766
0.104488	0.171462		0.136923	0.173641
0.0525995	0.0966377		0.0453843	0.0934104
