# Supplementary material for: Early dysfunction and progressive degeneration of the subthalamic nucleus in mouse models of Huntington's disease
Source: eLife. 2016 Dec 20;5:e21616. doi: 10.7554/eLife.21616 (PMC5199195; doi:10.7554/eLife.21616)
Supplement: Figure 3—source data 1. — DOI: http://dx.doi.org/10.7554/eLife.21616.009 [file elife-21616-fig3-data1.xlsx]

## Sheet: Sheet1
BACHD 2 months old						BACHD 6 months old						WT 6 months old
Control			D-AP5 pre-treated			Control			D-AP5 pre-treated			Control			D-AP5 pre-treated
Frequency	CV		Frequency	CV		Frequency	CV		Frequency	CV		Frequency	CV		Frequency	CV
0	NA		17.2447	0.24617		9.93124	0.414844		0.412566	2.36089		14.7355	0.161556		17.8159	0.123476
4.31872	0.309228		0	NA		24.3206	0.124776		6.69963	0.173033		10.369	0.160918		17.071	0.110466
0	NA		18.3774	0.229395		1.07224	1.15691		16.027	0.097167		14.1631	0.0964558		24.6447	0.111484
0	NA		25.3356	0.167803		0.930547	2.39623		13.5109	0.117481		4.88071	1.31244		12.3647	0.120199
0.247971	0.748352		5.95652	0.696268		15.7275	0.454051		5.34481	0.202424		11.4916	0.187242		1.24699	1.65996
0	NA		11.9246	0.2092		1.51456	1.41457		12.7163	0.0945275		8.49329	0.121713		0	NA
0.940383	0.741256		5.48854	0.608792		0	NA		9.78677	0.102074		7.2764	0.182025		16.9344	0.138395
9.76373	0.225451		4.43665	0.823129		8.72166	0.388289		13.7978	0.0824321		0	NA		15.4256	0.164109
0	NA		14.3025	0.137506		0	NA		6.69566	0.224011		31.8798	0.137631		3.47805	0.794191
0	NA		11.4821	0.144114		1.87056	0.623006		17.1178	0.0806474		10.4683	0.234185		19.6276	0.0945223
0	NA		14.9547	0.130803		0	NA		14.5563	0.0838395		12.4295	0.195916		10.0456	0.106593
0	NA		15.7513	0.0613754		0	NA		9.56153	0.0966959		7.84004	0.532651		16.8813	0.0895467
0	NA		26.1535	0.086462		2.31732	1.13751		12.4138	0.156899		13.1234	0.094307		1.72358	0.97628
0	NA		3.15152	0.925195		0	NA		6.03827	0.180002		20.2188	0.115376		5.5629	0.28541
0	NA		16.8543	0.0924314		0.210771	1.37598		0	NA		8.71636	0.112445		2.57745	0.520102
0	NA		6.30858	0.489154		7.20544	0.267728		29.0579	0.155861		14.8574	0.280366		7.64108	0.311709
2.52052	1.13233		7.52841	0.4513		2.52586	0.89153		12.8115	0.189934		6.572	0.802852		0	NA
2.03105	0.799386		6.90775	0.691789		10.3742	0.13526		20.1077	0.278619		2.62964	1.09357		4.01043	0.44028
0	NA		0	NA		6.64641	0.286789		13.0153	0.351747		19.5695	0.0867576		4.64317	0.60893
4.68275	0.282677		7.1441	0.588231		5.51026	0.335206		20.753	0.162427		14.2419	0.122352		0	NA
6.3648	0.47554		4.29494	0.623406		10.7301	0.167042		30.0338	0.10441		7.26352	0.230445		9.10336	0.171791
11.1213	0.193118		10.952	0.166417		13.8242	0.105265		16.8838	0.149346		0	NA		5.31215	0.346686
0	NA		4.15477	1.21591		0.272491	1.49692		18.0583	0.0663385		11.5452	0.206821		9.79302	0.148074
0	NA		10.3553	0.220884		0	NA		2.45713	0.650685		0	NA		0	NA
0	NA		5.7486	0.885753		0	NA		20.7867	0.076882		6.13751	0.244432		8.01791	0.32358
0	NA		2.27185	1.3071		0	NA		13.4619	0.126582		21.2453	0.0878589		0	NA
0	NA		11.6953	0.109463		0	NA		20.7207	0.07624		5.57984	0.27737		3.52225	0.272732
1.02092	0.824605		9.93851	0.383672		0	NA		10.3505	0.12589
0	NA		0	NA		0	NA		8.32927	0.220823
0	NA		10.048	0.199678		0	NA		16.9247	0.108516
