# Supplementary material for: Early dysfunction and progressive degeneration of the subthalamic nucleus in mouse models of Huntington's disease
Source: eLife. 2016 Dec 20;5:e21616. doi: 10.7554/eLife.21616 (PMC5199195; doi:10.7554/eLife.21616)
Supplement: Figure 4—source data 2. — DOI: http://dx.doi.org/10.7554/eLife.21616.012 [file elife-21616-fig4-data2.xlsx]

## Sheet: Figure 4C
D-AP5 pre-treatment
untreated	treated
0.61255	0.87016
0.483276	0.513712
0.353466	0.320165
0.375783	0.323517
0.475843	0.264824
0.337779	0.294598
0.342182	0.239141
0.390894	0.219337
0.499032	0.131674
0.331139	0.0538602
0.373218	0.174791
0.437671	0.392927
0.525223	0.325017
	0.367978
	0.420008
	0.440546
	0.566832
