# Supplementary material for: Early dysfunction and progressive degeneration of the subthalamic nucleus in mouse models of Huntington's disease
Source: eLife. 2016 Dec 20;5:e21616. doi: 10.7554/eLife.21616 (PMC5199195; doi:10.7554/eLife.21616)
Supplement: Figure 5—source data 1. — DOI: http://dx.doi.org/10.7554/eLife.21616.014 [file elife-21616-fig5-data1.xlsx]

## Sheet: Figure 5B
WT						BACHD
Frequency			CV			Frequency			CV
control	glibenclamide		control	glibenclamide		control	glibenclamide		control	glibenclamide
7.51857	9.08901		0.179782	0.119574		13.616	13.2964		0.188333	0.122617
20.7403	15.9434		0.188181	0.191337		9.1295	12.1432		0.164336	0.0920162
20.5715	19.1851		0.139382	0.119773		1.36281	11.7972		1.4577	0.183237
6.85377	8.82402		0.574117	0.361044		3.30675	7.0825		0.438769	0.177709
11.0031	11.5739		0.102396	0.0821527		10.3666	18.4225		0.389146	0.14811
16.684	16.0939		0.222581	0.157794		0	19.7458		NA	0.0917753
11.4527	15.3727		0.172633	0.188453		2.37115	11.0413		1.45011	0.419043
15.0036	20.4253		0.0962041	0.106837		11.5912	11.2992		0.260581	0.105639
						9.01039	11.1734		0.20926	0.15042
						4.71681	9.20477		0.954592	0.171098
						5.68878	9.48445		0.266675	0.109994
						0.369008	6.99038		1.41856	0.628477
						0.67636	2.87079		1.70361	0.538019
						7.94754	12.2852		0.281459	0.137422
						5.8312	15.7573		0.785439	0.282681
