# Supplementary material for: Early dysfunction and progressive degeneration of the subthalamic nucleus in mouse models of Huntington's disease
Source: eLife. 2016 Dec 20;5:e21616. doi: 10.7554/eLife.21616 (PMC5199195; doi:10.7554/eLife.21616)
Supplement: Figure 5—source data 2. — DOI: http://dx.doi.org/10.7554/eLife.21616.015 [file elife-21616-fig5-data2.xlsx]

## Sheet: Figure 5D
WT									BACHD
ISI rise			Frequency			CV			ISI rise			Frequency			CV
control	glibenclamide		control	glibenclamide		control	glibenclamide		control	glibenclamide		control	glibenclamide		control	glibenclamide
704.971	485.737		27.3956	18.7045		0.0973606	0.0808918		125.332	163.229		7.5319	8.5096		0.1419	0.0968
351.847	522.887		14.1558	20.2653		0.175249	0.0622148		59.1572	156.692		4.4708	10.8017		0.2465	0.1335
120.799	218.517		5.15538	8.42247		0.237206	0.278296		45.9349	74.1623		2.5776	3.9169		0.2364	0.1338
413.848	216.748		14.6609	8.25337		0.065337	0.155881		108.765	387.249		4.7382	15.0662		0.8787	0.1513
317.079	203.643		12.5228	8.01875		0.148722	0.0923196		308.745	369.884		13.3571	16.2781		0.0747	0.0972
768.405	830.204		36.4396	40.7291		0.0463363	0.0678192		298.045	474		14.9989	22.8418		0.1315	0.0725
508.346	361.926		22.4233	16.7532		0.0856079	0.0488491		281.359	544.452		10.5798	20.855		0.3482	0.157
