# Supplementary material for: Early dysfunction and progressive degeneration of the subthalamic nucleus in mouse models of Huntington's disease
Source: eLife. 2016 Dec 20;5:e21616. doi: 10.7554/eLife.21616 (PMC5199195; doi:10.7554/eLife.21616)
Supplement: Figure 6—source data 1. — DOI: http://dx.doi.org/10.7554/eLife.21616.017 [file elife-21616-fig6-data1.xlsx]

## Sheet: Figure 6B
Frequency			CV
control	gliclazide		control	gliclazide
4.9104	11.1661		0.76481	0.101976
0.747307	3.82274		1.24077	0.810036
5.35736	14.0531		0.521769	0.0825258
2.34439	4.89004		0.558888	0.353611
10.1073	13.741		0.157284	0.111551
7.30504	8.57161		0.355219	0.257438
