# Supplementary material for: Early dysfunction and progressive degeneration of the subthalamic nucleus in mouse models of Huntington's disease
Source: eLife. 2016 Dec 20;5:e21616. doi: 10.7554/eLife.21616 (PMC5199195; doi:10.7554/eLife.21616)
Supplement: Figure 7—source data 1. — DOI: http://dx.doi.org/10.7554/eLife.21616.019 [file elife-21616-fig7-data1.xlsx]

## Sheet: Figure 7C
NMDA pre-treatment
Untreated			Treated
Frequency	CV		Frequency	CV
13.1313	0.187659		2.96165	0.32359
14.4997	0.162165		3.19326	0.252781
10.7769	0.27355		3.78315	0.34057
13.8374	0.223667		4.46568	0.250359
14.5907	0.086464		3.11439	0.2614
15.6128	0.120985		2.14528	0.22313
21.0908	0.125684		0	NA
23.9372	0.069363		3.93856	0.341505
11.9062	0.128158		3.89332	0.881526
11.6279	0.100634		24.1955	0.075855
13.3871	0.077466		6.26606	0.926499
7.2998	0.46699		7.34376	0.208776
16.0712	0.19038		6.37633	0.322024
10.7076	0.453583		5.63666	0.830111
32.0801	0.18004		19.8169	0.096837
17.5568	0.130587		10.8353	0.615531
15.7649	0.102959		5.506	0.83493
10.3994	1.30087		0	NA
6.27865	0.557657		11.974	0.873039
19.6148	0.262897		3.55101	1.16871
13.5488	0.287737		10.8595	0.108398
0	NA		4.69065	0.412547
0	NA		3.98311	0.160193
2.66234	0.664759		0	NA
3.46861	0.647589		0	NA
0	NA		0	NA
0	NA		5.92522	1.66653
33.3078	0.083466		15.313	0.084165
50.6022	0.069998		27.6955	0.178057
34.6512	0.057216		13.969	0.104437
35.4371	0.118718		13.7033	0.110737
26.2646	0.057236		9.09256	0.17044
25.9808	0.146015		19.7632	0.113514
11.3022	0.281302		11.0935	0.125578
0	NA		18.9908	0.101829
5.84146	0.218342		5.15145	0.574387
0	NA		0	NA
6.06575	0.213333		0	NA
25.7248	0.218213		0	NA
21.0517	0.164536		0	NA
11.9273	0.354814		8.53971	0.242195
23.2396	0.111313		0	NA
31.9	0.1095		0	NA
15.5761	0.116749		0	NA
26.8262	0.089524		0	NA
35.6672	0.082313		0	NA
35.572	0.08384		4.23621	0.260319
16.7462	0.143589		15.0546	0.07174
2.33138	1.27126		1.52054	2.08482
24.3724	0.098611		16.8186	0.062695
28.2805	0.135249		14.0089	0.083364
22.7454	0.078788		0	NA
42.5822	0.063903		6.35364	0.371745
13.2712	0.06803		4.1561	1.03504
0	NA		13.5037	0.120265
0	NA		0	NA
0	NA		13.9872	0.097621
7.84929	0.425353		7.22909	0.770838
11.2798	0.14472		17.6653	0.085682
2.83294	0.799428		8.00384	0.147327
9.90491	0.248019		7.51654	0.2569
14.0667	0.123715		0	NA
25.1845	0.146609		9.89609	0.805948
5.3322	0.358505		8.83626	0.131059
16.9007	0.097475		0	NA
57.5904	0.09427		9.81065	0.206446
33.1071	0.074941		0	NA
14.8931	0.269208		3.13972	0.72405
27.5642	0.066146		26.3491	0.101283
11.2119	0.228543		36.3729	0.068778
24.8281	0.078429		22.2846	0.240652
18.8349	0.063764		32.5542	0.067778
18.773	0.067998		14.3662	0.157626
20.0144	0.074782		29.7663	0.056104
16.219	0.069466		3.24528	0.939216
			31.1255	0.044516
			25.4492	0.093404
			14.347	0.339077
			31.4574	0.076781
			0	NA
			0.408563	1.52292
			4.06306	0.709369
			0	NA
			0	NA
			3.28407	1.00144
			3.01588	0.570735
			4.0566	1.55347
