# Supplementary material for: Early dysfunction and progressive degeneration of the subthalamic nucleus in mouse models of Huntington's disease
Source: eLife. 2016 Dec 20;5:e21616. doi: 10.7554/eLife.21616 (PMC5199195; doi:10.7554/eLife.21616)
Supplement: Figure 7—source data 2. — DOI: http://dx.doi.org/10.7554/eLife.21616.020 [file elife-21616-fig7-data2.xlsx]

## Sheet: Figure 7D
Untreated						NMDA pre-treated
Frequency			CV			Frequency			CV
control	glibenclamide		control	glibenclamide		control	glibenclamide		control	glibenclamide
11.9273	30.0345		0.354814	0.073981		0	11.0258		NA	0.113522
42.5822	40.9853		0.063903	0.083106		0	26.4354		NA	0.263998
7.84929	14.4377		0.425353	0.088678		4.1561	18.4427		1.03504	0.138394
16.9007	22.9816		0.097475	0.065495		8.00384	12.1021		0.147327	0.071518
27.5642	27.0775		0.066146	0.097479		3.13972	10.8222		0.72405	0.170806
16.219	16.9082		0.069466	0.06219		3.24528	11.854		0.939216	0.264557
						31.4574	29.9805		0.076781	0.082935
						3.28407	10.8412		1.00144	0.061473
						3.01588	10.9728		0.570735	0.12939
						4.0566	8.5219		1.55347	0.119253
