# Supplementary material for: Early dysfunction and progressive degeneration of the subthalamic nucleus in mouse models of Huntington's disease
Source: eLife. 2016 Dec 20;5:e21616. doi: 10.7554/eLife.21616 (PMC5199195; doi:10.7554/eLife.21616)
Supplement: Figure 8—source data 1. — DOI: http://dx.doi.org/10.7554/eLife.21616.022 [file elife-21616-fig8-data1.xlsx]

## Sheet: Figure 8C-D
Figure 8C										Figure 8D
Frequency					CV					Frequency					CV
control	catalase	catalase + glibenclamide			control	catalase	catalase + glibenclamide			control	glibenclamide	glibenclamide + catalase			control	glibenclamide	glibenclamide + catalase
7.32964	10.8362	11.8422			0.321493	0.124332	0.1066			4.71681	9.20477	8.08819			0.954592	0.171098	0.148077
0.73961	13.3372	12.4887			3.09625	0.124355	0.147421			5.68878	9.48445	9.23719			0.266675	0.109994	0.106286
0	13.822	8.7826			NA	0.0995558	0.123824			0.369008	6.99038	6.95784			1.41856	0.628477	0.548059
6.66455	8.10465	5.61159			0.267388	0.176921	0.225804			0.67636	2.87079	3.90924			1.70361	0.538019	0.206541
3.64039	10.7575	9.74028			0.69825	0.119723	0.121674			7.94754	12.2852	13.2411			0.281459	0.137422	0.127365
5.47722	14.7708	14.3839			1.20474	0.209241	0.143108			5.8312	15.7573	15.1501			0.785439	0.282681	0.204719
2.27631	7.57523	7.57297			2.05095	0.168795	0.168147			6.9697	7.80367	8.20166			0.202939	0.173648	0.112934
3.42276	5.99441	15.3403			2.19639	2.0159	0.539128			2.00374	7.75279	14.3768			0.883388	0.599557	0.107446
0.35812	13.9681	14.3914			1.91295	0.119195	0.109465
4.76005	7.59681	8.15333			0.283399	0.217085	0.231615
3.00483	10.7169	12.2929			0.880323	0.16663	0.136131
