# Supplementary material for: Early dysfunction and progressive degeneration of the subthalamic nucleus in mouse models of Huntington's disease
Source: eLife. 2016 Dec 20;5:e21616. doi: 10.7554/eLife.21616 (PMC5199195; doi:10.7554/eLife.21616)
Supplement: Figure 9—source data 1. — DOI: http://dx.doi.org/10.7554/eLife.21616.024 [file elife-21616-fig9-data1.xlsx]

## Sheet: Figure 9A–B
WT						BACHD						Delta frequency			Delta CV
Frequency			CV			Frequency			CV
control	catalase		control	catalase		control	catalase		control	catalase		WT	BACHD		WT	BACHD
7.93021	7.6858		0.175218	0.135186		7.32964	10.8362		0.321493	0.124332		2.7763	3.50656		-0.058731	-0.197161
4.29332	9.05223		0.868925	0.112148		0.73961	13.3372		3.09625	0.124355		0.8097	12.5976		-0.099278	-2.97189
20.7147	15.7403		0.233351	0.172357		0	13.822		NA	0.0995558		0.40742	13.822		-0.002913	-0.090467
11.0759	9.01226		0.156924	0.184382		6.66455	8.10465		0.267388	0.176921		1.9704	1.4401		-0.0559115	-0.578527
13.21	15.4352		0.129493	0.0698026		3.64039	10.7575		0.69825	0.119723		11.4469	7.11711		-0.067383	-0.995499
15.0078	17.7321		0.0982156	0.083378		5.47722	14.7708		1.20474	0.209241		-0.9428	9.29358		0.0065627	-1.88216
14.8652	19.1292		0.163265	0.121298		2.27631	7.57523		2.05095	0.168795		1.8137	5.29892		-0.0294791	-0.18049
						3.42276	5.99441		2.19639	2.0159			2.57165			-1.79375
						0.35812	13.9681		1.91295	0.119195			13.61			-0.066314
						4.76005	7.59681		0.283399	0.217085			2.83676			-0.713693
						3.00483	10.7169		0.880323	0.16663			7.71207
