# Supplementary material for: Early dysfunction and progressive degeneration of the subthalamic nucleus in mouse models of Huntington's disease
Source: eLife. 2016 Dec 20;5:e21616. doi: 10.7554/eLife.21616 (PMC5199195; doi:10.7554/eLife.21616)
Supplement: Figure 10—source data 1. — DOI: http://dx.doi.org/10.7554/eLife.21616.026 [file elife-21616-fig10-data1.xlsx]

## Sheet: Figure 10B
Frequency				CV
control	MCS	MCS + glibenclamide		control	MCS	MCS + glibenclamide
7.94602	10.164	19.9309		0.272288	0.315492	0.141259
14.1295	8.19926	12.024		0.222839	0.303126	0.268454
12.207	10.025	11.062		0.18456	0.21291	0.16793
7.9977	4.8318	7.8842		0.14071	0.23866	0.11831
12.38	10.535	19.185		0.15243	0.21701	0.14627
18.416	13.98	21.147		0.21909	0.1238	0.12179
7.6908	4.9961	9.3407		0.20956	0.33352	0.085169
12.035	9.0402	17.072		0.13124	0.33741	0.080702
7.64513	3.52395	10.2873		0.214761	1.62586	0.118517
8.3812	4.0963	16		0.19283	0.73729	0.12043
13.5143	13.3951	14.6292		0.273928	0.279986	0.314716
