# Supplementary material for: Early dysfunction and progressive degeneration of the subthalamic nucleus in mouse models of Huntington's disease
Source: eLife. 2016 Dec 20;5:e21616. doi: 10.7554/eLife.21616 (PMC5199195; doi:10.7554/eLife.21616)
Supplement: Figure 11—source data 1. — DOI: http://dx.doi.org/10.7554/eLife.21616.028 [file elife-21616-fig11-data1.xlsx]

## Sheet: Figure 11B–C
12 months old WT				12 months old BACHD					2 months old WT				2 months old BACHD
count	volume	density		count	volume	density			count	volume	density		count	volume	density
11134	0.0839041	132699		7052	0.0780283	90377.5			10373	0.0971	106880		10622	0.1113	95473
9229	0.0861079	107180		8634	0.0823174	104887			14414	0.0983	146621		11705	0.0803	145711
11545	0.0915261	126139		10734	0.0790629	135765			8384	0.0723	115985		10638	0.0804	132249
12360	0.0997482	123912		9285	0.0805483	115272			9341	0.1239	75396		9129	0.0791	115479
9070	0.0748052	121248		7307	0.0590649	123711			12301	0.1254	98100		10513	0.0863	121885
8534	0.0873558	97692.4		7047	0.0511779	137696			9415	0.0902	104360		13877	0.0853	162640
10793	0.0954578	113066		6695	0.0751111	89134.6			16175	0.142225	113728		14503	0.116169	124844
