# Supplementary material for: Early dysfunction and progressive degeneration of the subthalamic nucleus in mouse models of Huntington's disease
Source: eLife. 2016 Dec 20;5:e21616. doi: 10.7554/eLife.21616 (PMC5199195; doi:10.7554/eLife.21616)
Supplement: Figure 12—source data 1. — DOI: http://dx.doi.org/10.7554/eLife.21616.030 [file elife-21616-fig12-data1.xlsx]

## Sheet: Figure 12B
WT			Q175
Frequency	CV		Frequency	CV
11.6021	0.27503		1.4341	1.07364
0.78174	4.91377		0	NA
4.06752	0.85634		4.8384	0.62778
6.96864	0.25243		0	NA
13.0719	0.33484		6.00962	0.60739
3.51902	0.98452		1.29313	1.64705
15.824	0.11374		0	NA
6.45369	0.17462		0	NA
14.8047	0.26022		0	NA
4.80307	0.56018		0	NA
6.33192	0.30467		0	NA
0.85653	0.94176		0	NA
6.98227	0.16426		0	NA
0	NA		6.25704	0.41535
0.85558	3.14117		0	NA
25.4123	0.14468		0	NA
19.6951	0.10922		7.91077	0.22755
18.5127	0.06801		0.199	1.32297
22.8697	0.13479		9.33968	0.13455
6.29445	0.51987		10.5232	0.33771
12.0139	0.09324		0	NA
0.98058	3.17062		0	NA
20.2425	0.07881		0	NA
0	NA		0	NA
0	NA		0	NA
5.30307	0.1857		4.16719	0.92695
0	NA		0.83661	1.71363
0	NA		0	NA
1.58163	1.03954		0.54888	2.17943
7.05517	0.29175		4.36681	1.04961
2.02175	0.79297		15.6517	0.27639
9.40709	0.35024		21.0677	0.1093
20.1903	0.07781		0	NA
19.3368	0.07384		6.32911	0.54541
19.7661	0.0971		4.91715	0.62453
2.64288	0.6322		11.2876	0.13003
27.2139	0.08904		9.7704	0.15075
1.59672	1.22144		0	NA
8.23577	0.15964		0	NA
11.559	0.12078		0	NA
0.63654	1.01314		0	NA
0	NA		0	NA
10.353	0.10754		0	NA
10.3658	0.21897		0	NA
10.7541	0.09276		0	NA
2.28988	1.11239		1.29077	1.17041
1.10622	0.65328		0	NA
12.196	0.11844		0.03459	0.8193
8.96749	0.16157		0	NA
16.1752	0.12747		0	NA
4.22603	0.34407		0	NA
11.0357	0.42029		0	NA
11.8548	0.1588		0	NA
5.24973	0.87964		10.3779	0.23492
13.9412	0.18766		3.58076	0.91188
21.9372	0.11368		0	NA
12.057	0.16812		1.49562	1.13425
9.90559	0.13076		29.7027	0.09682
17.486	0.09837		29.1095	0.07252
21.2541	0.07352		14.8655	0.07707
0	NA		0	NA
5.32988	0.24257		0	NA
0	NA		56.5267	0.35759
19.1979	0.07896		4.57011	0.20464
10.8045	0.1867		6.98619	0.1697
20.4004	0.09314		0.15158	0.78115
19.0324	0.29731		8.10725	0.12537
6.34465	0.19404		0	NA
7.42803	0.60055		0	NA
10.7359	0.53594		0	NA
19.0855	0.42036		0.03223	1.9913
6.22713	0.53165		0	NA
12.9465	0.40783		0	NA
25.0501	0.12987		12.2841	0.14823
1.18689	0.61697		0	NA
14.6715	0.11584		14.1652	0.12088
24.1064	0.10476		18.2026	0.08454
17.9216	0.12225		18.6544	0.14162
0	NA		13.1379	0.0937
2.79502	0.49984		11.5881	0.13536
6.66869	0.1414		4.88896	0.53022
0	NA		14.0839	0.08138
3.4647	1.61517		0	NA
12.0903	0.19029		0	NA
0	NA		0	NA
11.1235	0.25497		0	NA
3.5059	0.81081		0	NA
0	NA		0	NA
0	NA		0	NA
10.6529	0.21092		0.1941	1.15178
