# Supplementary material for: Early dysfunction and progressive degeneration of the subthalamic nucleus in mouse models of Huntington's disease
Source: eLife. 2016 Dec 20;5:e21616. doi: 10.7554/eLife.21616 (PMC5199195; doi:10.7554/eLife.21616)
Supplement: Figure 12—source data 2. — DOI: http://dx.doi.org/10.7554/eLife.21616.031 [file elife-21616-fig12-data2.xlsx]

## Sheet: Figure 12D
Frequency			CV
control	glibenclamide		control	glibenclamide
4.29492	10.9934		0.492074	0.170221
4.61064	6.88781		0.376643	0.172791
4.94264	11.0157		0.561998	0.0873069
0.99442	14.5721		1.17139	0.178541
7.81427	13.2153		0.406414	0.135129
5.69017	10.0544		0.269923	0.106958
