# Supplementary material for: Early dysfunction and progressive degeneration of the subthalamic nucleus in mouse models of Huntington's disease
Source: eLife. 2016 Dec 20;5:e21616. doi: 10.7554/eLife.21616 (PMC5199195; doi:10.7554/eLife.21616)
Supplement: Figure 12—source data 3. — DOI: http://dx.doi.org/10.7554/eLife.21616.032 [file elife-21616-fig12-data3.xlsx]

## Sheet: Figure 12F
Untreated			D-AP5 Pre-treated
Frequency	CV		Frequency	CV
0	NA		29.6041	0.281446
15.961	0.0723206		15.1748	0.150306
7.46588	0.128793		21.0129	0.10008
12.2138	0.0772311		23.5217	0.0660529
8.03156	0.141555		16.5692	0.322139
4.57189	0.685283		13.3324	0.119077
1.52892	1.26347		18.2527	0.0595908
0	NA		19.2938	0.0566268
0	NA		9.85392	0.0979375
17.7513	0.195246		19.0475	0.0629936
4.76634	0.597989		15.0934	0.0657861
0	NA		14.8933	0.0885207
5.20437	0.741348		14.9146	0.0953835
0	NA		9.78158	0.0871514
0	NA		6.57421	0.142855
0	NA		0	NA
0	NA		0	NA
2.79204	0.955951		0	NA
4.36856	0.589652		0	NA
15.5599	0.0902647		0	NA
8.15044	0.144361		0	NA
3.32173	0.752538		0	NA
0	NA		2.95778	1.50461
0.370721	0.883691		7.98804	0.757968
2.82874	0.749656		6.05955	0.909717
0	NA		10.5729	0.478479
15.633	0.0894726		3.43817	0.784806
0	NA		29.8426	0.0505605
0	NA		7.18151	0.711901
0	NA		0	NA
13.6445	0.18503		16.8778	0.274884
9.59282	0.116511		35.0793	0.057265
8.67832	0.131532		0	NA
20.2544	0.0843399		17.1739	0.0892381
21.162	0.0637588		0	NA
8.89913	0.175725		18.3043	0.0728248
17.5085	0.0836138		0	NA
6.42559	0.278996		0	NA
13.4285	0.164722		14.1861	0.144176
14.6242	0.105049		19.4277	0.196042
0	NA		20.2208	0.190682
3.14211	0.724693		26.7523	0.106553
0	NA		6.11291	0.867588
6.76064	0.154002		19.5111	0.18265
10.5696	0.0938398		11.5824	0.358023
