# Supplementary material for: Early dysfunction and progressive degeneration of the subthalamic nucleus in mouse models of Huntington's disease
Source: eLife. 2016 Dec 20;5:e21616. doi: 10.7554/eLife.21616 (PMC5199195; doi:10.7554/eLife.21616)
Supplement: Figure 12—source data 4. — DOI: http://dx.doi.org/10.7554/eLife.21616.033 [file elife-21616-fig12-data4.xlsx]

## Sheet: Figure 12H
12 months old WT				12 months old Q175
count	volume	density		count	volume	density
10609	0.0969059	109477		6613	0.0801911	82465.5
6759	0.112873	59881.5		6008	0.0583187	103020
6147	0.083735	73410.2		6420	0.069533	92330.3
8509	0.0737983	115301		8314	0.0701802	118466
9376	0.0829298	113059		5792	0.0910354	63623.6
8792	0.0807925	108822		5307	0.0962426	55141.9
